# Supplementary material for: Knockdown of Pyruvate Kinase M2 Inhibits Cell Proliferation, Metabolism, and Migration in Renal Cell Carcinoma
Source: MDPI journal article supplement (doi:10.3390/ijms20225622), 2019-11-10
Supplement: s1 [file s1]

## Supplementary Figures

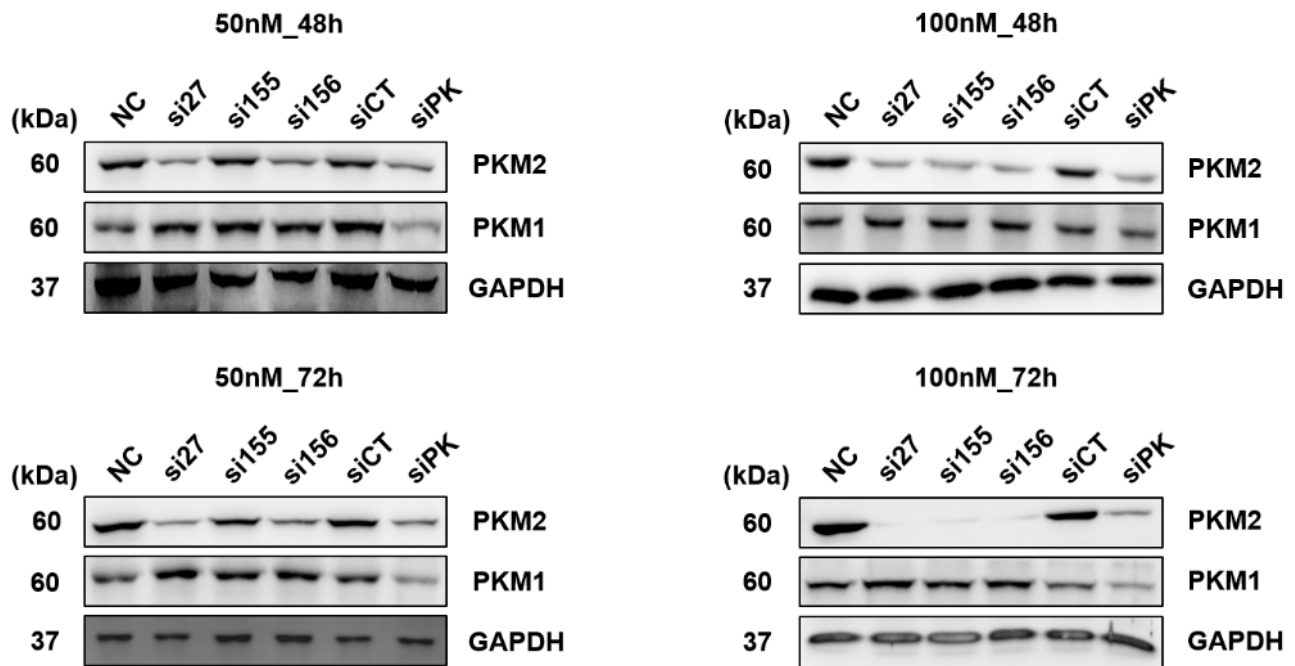

**Supplementary Figure S1.** Expression profiles of PKM1 and PKM2 proteins after siRNA transfection at various concentrations for different time intervals. GAPDH was used as internal loading control. Representative blots are shown.

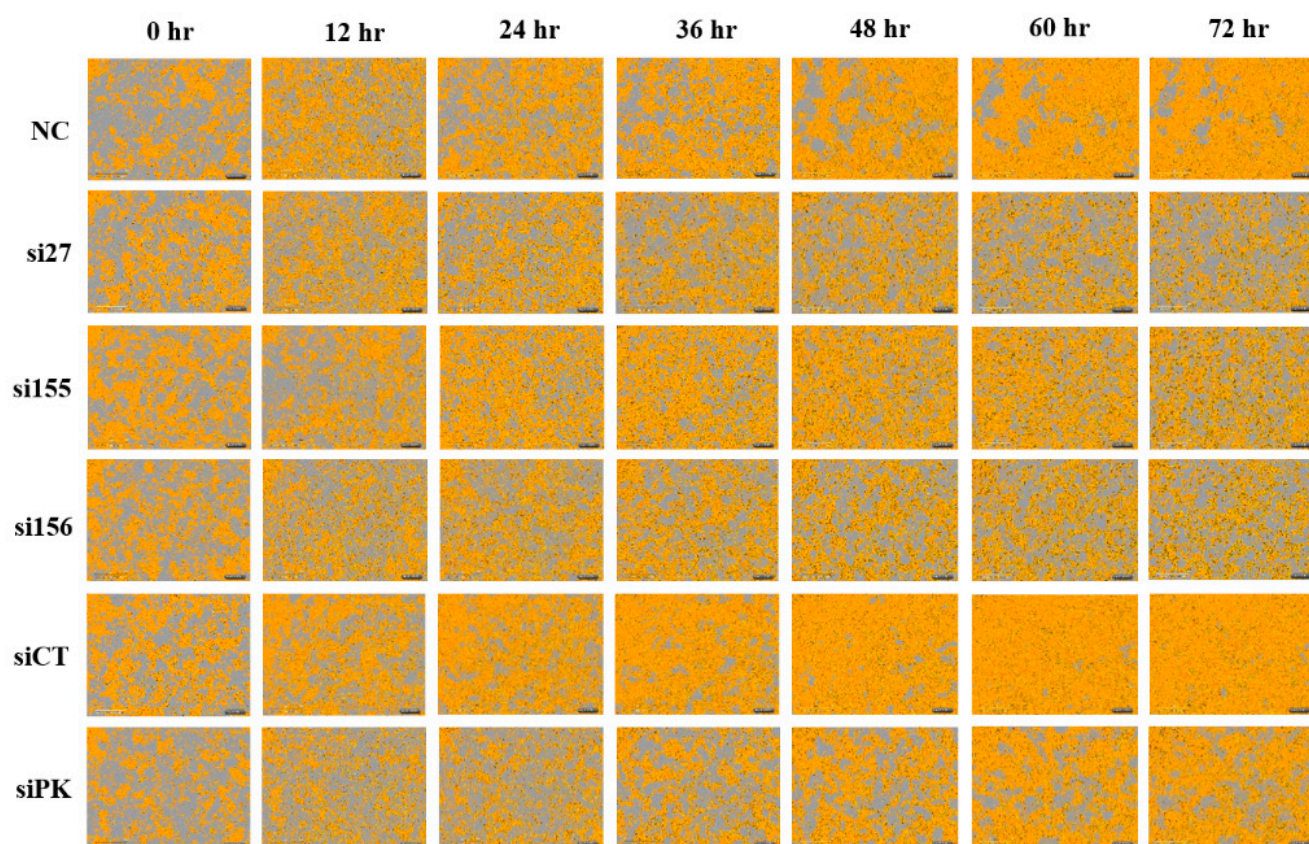

**Supplementary Figure S2.** Analysis of viability and density of 786-O cells after PKM2 expression knockdown with different siRNAs.

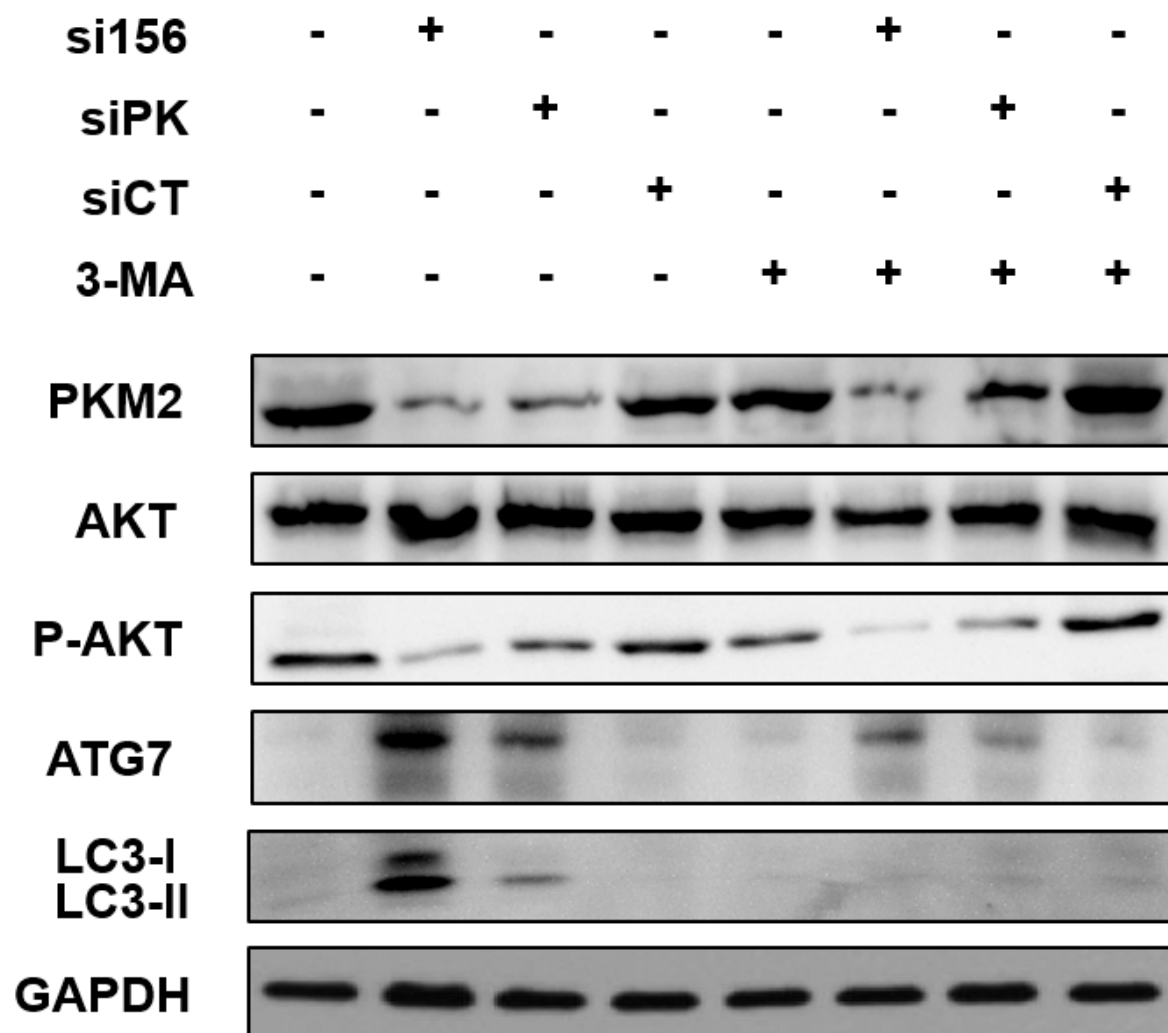

**Supplementary Figure S3.** PKM2 mediates autophagy via the PI3K/AKT signaling pathway. (A) 786-O cells were transfected with si156, siPK, and siCT and treated with 3-MA (2 mM) for 24 h. Cell lysates were prepared and expression levels of PKM2, total AKT, p-AKT, ATG7, and LC3 were analyzed with Western blotting. GAPDH was used as an internal loading control.
